# Supplementary material for: Organosilicate thin film containing Ru(bpy)32+ for an electrogenerated chemiluminescence (ECL) sensorElectronic supplementary information (ESI) available: experimental details. See http://www.rsc.org/suppdata/cc/b3/b303766e/
Source: Royal Society of Chemistry journal article supplement (doi:10.1039/b303766e), 2003-01-01
Supplement: b303766e.doc [file b303766e.doc]

**Electronic supplementary information (ESI)**

“Organosilicate thin film containing Ru(bpy)32+ for electrogenerated chemiluminescence (ECL) sensor”

Jin-Kyu Lee*, Seung-Hee Lee, Myungsun Kim, Hasuck Kim,

Dong-Hyun Kim, and Won-Yong Lee*

**1. Synthetic scheme of modified Ru(bpy’)32+**

1. **Synthesis of 4,4’-di-5-pentenyl-2,2’-bipyridyl (Ligand)**

To the diisopropyl amine (1.52 ml, 10.8 mmol) solution in 10 ml of THF was added 6.8 mlof *n*-butyl lithium solution (1.6 M in hexane, 10.8 mmol) at 0 °C under nitrogen. After mixture was stirred for 30 min at 0 °C, 4,4’-methyl-2,2’-bipyridine (1 g, 5.4 mmol) in 35 ml of THF was slowly added by syringe-pump for 30 min. to generate a deep brown solution. 4-Bromo-1-butene (1.7 g, 12 mmol, 15 % excess) in 5 ml of THF was slowly added to this deep brown solution and the mixed solution was stirred at 0 °C for 30 min. The reaction mixture was quenched with ice water and washed with a saturated NaHCO3 solution, and extracted with Et2O. The organic layer was dried over sodium sulfate and the solvent was evaporated under vacuum to give 4,4’-di-5-pentenyl-2,2’-bipyridyl (93% yield).

**1H NMR (300MHz, CDCl3):** 8.56 (d, 1H, bpy-H), 8.27 (s, 1H, bpy-H), 7.15 (dd, 1H, bpy-H), 5.81 (m, 1H, vinyl-H), 5.06 (t, 2H, vinyl-H), 2.72 (t, 2H, bpy-CH2), 2.14 (quet, 2H, vinyl-CH2), 1.81 (quint, 2H, bpy-CH2-*CH2*)

**13C NMR:** 165.5, 156.9, 150.5, 139.0, 123.7, 121.0, 72.3, 71.1, 71.0, 71.0, 69.4, 65.3, and 59.4

1. **Synthesis of [Ru(L)3]2+(Cl-)2**

A mixture of 4,4’-di-5-pentenyl-2,2’-bipyridyl ligand(0.75 g, 2.57 mmol, 11% excess) and Ru(DMSO)4Cl2 (0.37 g, 0.77 mmol) in 75 ml of mixed solvent of EtOH and H2O (3:1, v/v) was purged with N2 for 30 min. The mixed solution was refluxed for 36 hr. The deep red complex was purified by re-precipitation with MeOH/ Et2O to remove an excess amount of ligand.

**1H NMR (300MHz, CDCl3):** 8.68 (s, 2H, bpy-H), 7.57 (d, 2H, bpy-H), 7.31 (dd, 2H, bpy-H), 5.80 (m, 2H, vinyl-H), 4.98 (t, 4H, vinyl-H), 2.89 (t, 4H, bpy-CH2), 2.12 (quet, 4H, vinyl-CH2), 1.86 (quint, 4H, bpy-CH2-*CH2*).

1. **Hydrosilation of [Ru(L)3]2+(Cl-)2**

Ru[(L)3]2+(Cl-)2 (L = modified bpy) complex (0.4 g) was reacted with an excess amount of trimethoxysilane (TMS) using Pt/C (0.1 g, 10 w%) catalyst in 5 mL of dried MeOH under nitrogen at 50 C for 3 days. After the completion of the hydrosilation reaction, the mixture was filtered to remove Pt/C catalyst under nitrogen, and then the excess trimethoxysilane and methyl alcohol was removed under vacuum to give pure [Ru(bpy’)3](Cl-)2 (quantitative yield).

**1H NMR (300MHz, CDCl3):** 8.60 (s, 2H, bpy-H), 7.44 (d, 2H, bpy-H), 7.26 (dd, 2H, bpy-H), 3.53 (s, Si-OMe), 2.82(t, 4H, bpy-CH2), 1.66 (m, 4H, bpy-CH2-*CH2*) 1.28 (m, 8H, bpy-(CH2)2-*CH2-CH2*), 0.60 (t, 4H, Si-CH2)

1. **Modification of ITO surface with [Ru(bpy’)3](Cl-)2 complex**

30 % (w/w) of [Ru(bpy’)3](Cl-)2 solution in the mixed solvent of iso-propyl alcohol and methyl alcohol (1:1, w/w) was spin-coated on the pre-cleaned ITO surface at 3000 rpm for 30 sec. Generated thin films were dried in the ambient air for 18 hr at room temperature to remove solvent and to precede the gelation, and then cured at 170 °C for 24 hr to complete the gelation.

In order to find the optimum condition to complete the gelation, UV absorption intensity from the coated gel film of [Ru(bpy’)3](Cl-)2 was checked after the gelation and curing processes. If all the modified [Ru(bpy’)3](Cl-)2 complexes were not incorporated into the gelation, they were easily washed out with methyl alcohol to cause the significant change of UV absorbance. From the experiments at different drying and curing conditions, the optimum processing conditions of the gelation was obtained as 18 hr drying in the ambient air followed by 24 hr curing at 170 °C, where the coated gel film of [Ru(bpy’)3](Cl-)2 showed no differences in UV measurement before and after the methyl alcohol washing as shown below (Figure).

**Figure.** UV-Vis absorptions of the coated gel film of [Ru(bpy’)3](Cl-)2 before and after the methyl alcohol washing (Cured condition; 18 hr drying in the ambient air, 24 hr curing at 170 °C)
